# Supplementary material for: Phosphorus-doped In2S3 with rich sulfur vacancies toward efficient photocatalytic hydrogen production from formaldehyde solution
Source: Royal Society of Chemistry journal article supplement (doi:10.1039/d4se00123k), 2024-01-01
Supplement: d4se00123k1.pdf [file d4se00123k1.pdf]

## Electronic Supplementary Information (ESI)

### Phosphorus-doping In<sub>2</sub>S<sub>3</sub> with rich sulfur vacancy toward efficient photocatalytic hydrogen production from formaldehyde solution

*Jing Sui,<sup>a</sup> Zhengxin Peng,<sup>a</sup> Nan Lu,<sup>a,b</sup> KaiCheng Qian,<sup>b</sup> Xiaofan Zhang,<sup>a</sup> Tong Wei,<sup>b</sup> Renhong Li <sup>b</sup>and Xiaoqing Yan<sup>\*a</sup>*

[a] Department of Chemistry, School of Chemistry and Chemical Engineering, Zhejiang Sci-Tech University, Hangzhou, 310018, PR China.

[b] National Engineering Lab for Textile Fiber Materials and Processing Technology, School of Materials Science & Engineering, Zhejiang Sci-Tech University, Hangzhou, 310018, PR China.

#### **\*Corresponding Authors**

*E-mail: yanxiaoqing927@126.com (X.Q. Yan)*

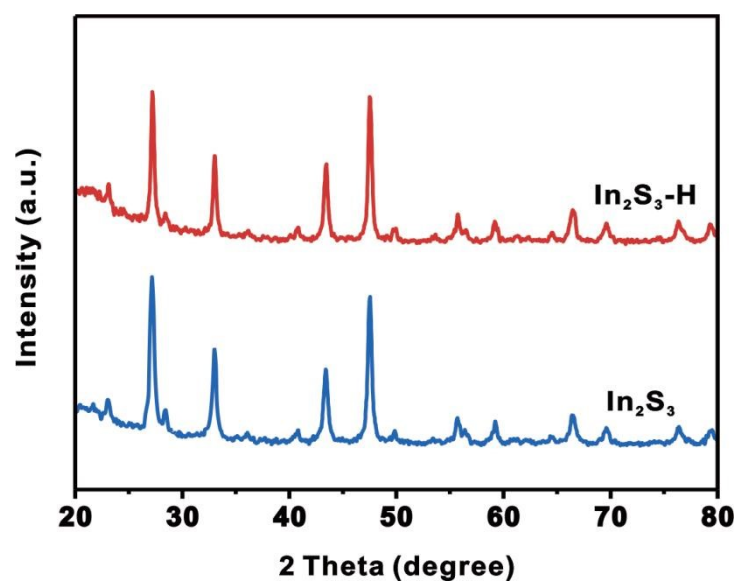

**Figure S1.** XRD patterns of  $\text{In}_2\text{S}_3$  and  $\text{In}_2\text{S}_3\text{-H}$ .

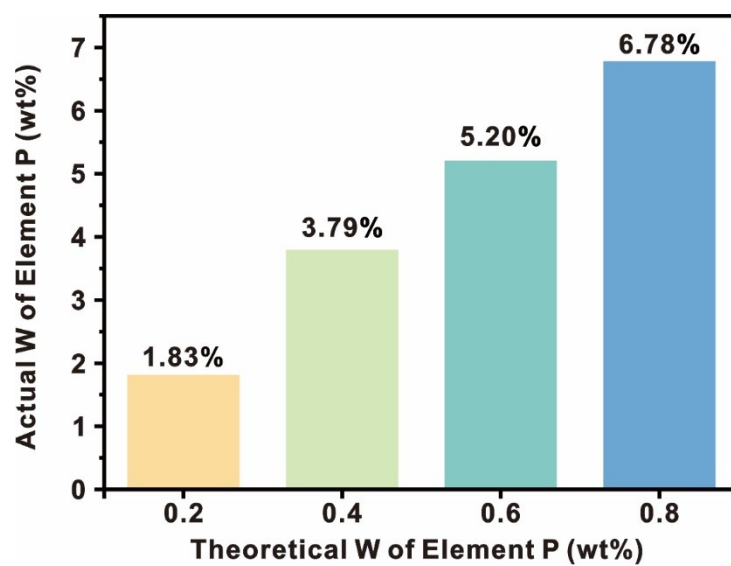

**Figure S2.** Mass fraction of phosphorus in P-In<sub>2</sub>S<sub>3</sub>.

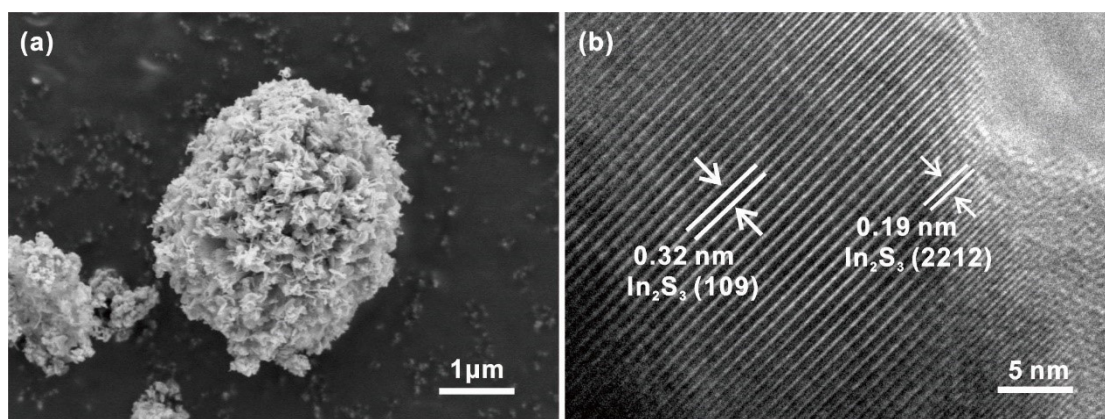

**Figure S3.** (a) SEM and (b) HRTEM of  $\text{In}_2\text{S}_3$ .

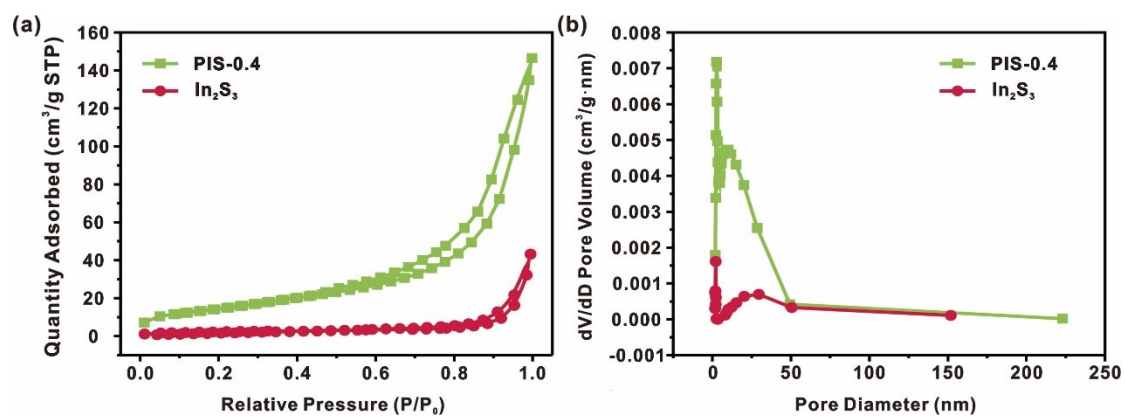

**Figure S4.** (a)  $\text{N}_2$  adsorption-desorption isotherms and (b) the pore size distribution plots of PIS-0.4 and  $\text{In}_2\text{S}_3$ .

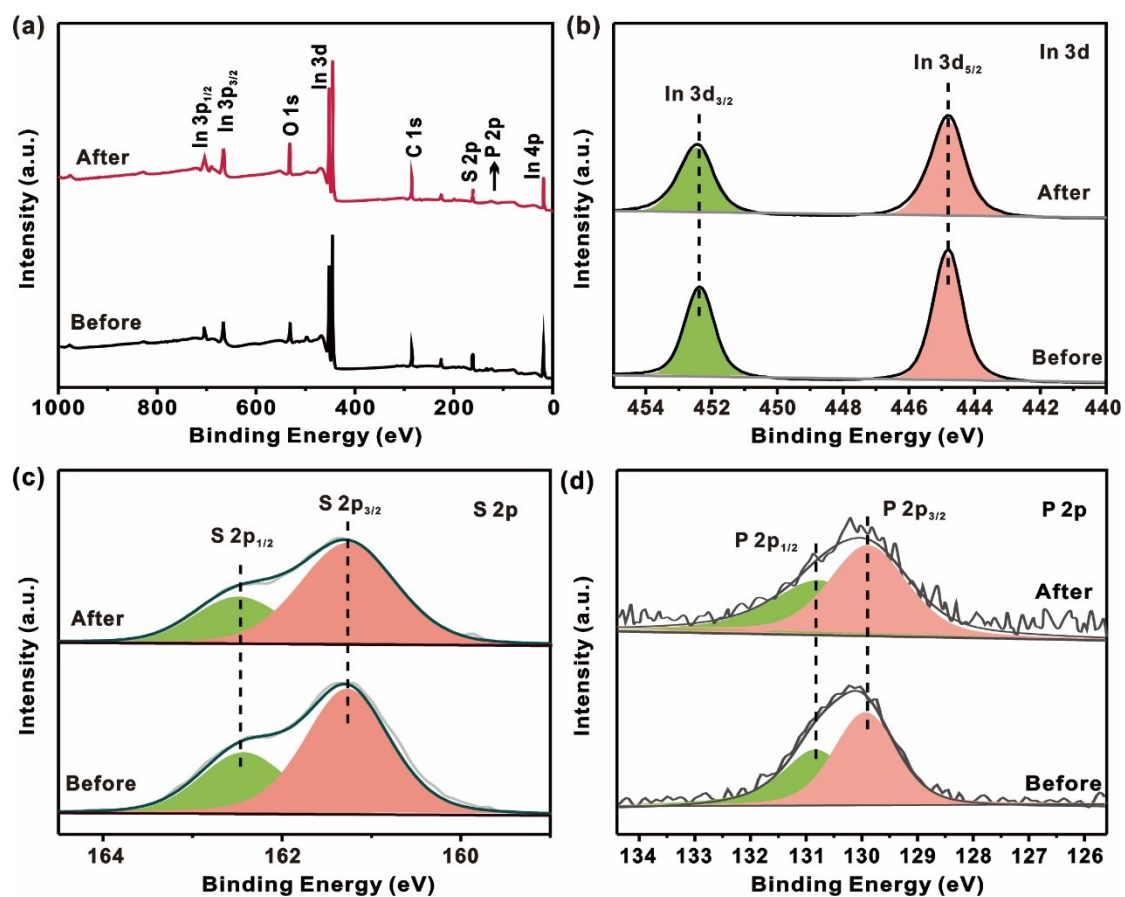

**Figure S5.** The XPS (a) survey, (b) In 3d, (c) S 2p, and (d) P 2p core levels spectra of PIS-0.4 before and after photocatalytic HCHO oxidation reaction.

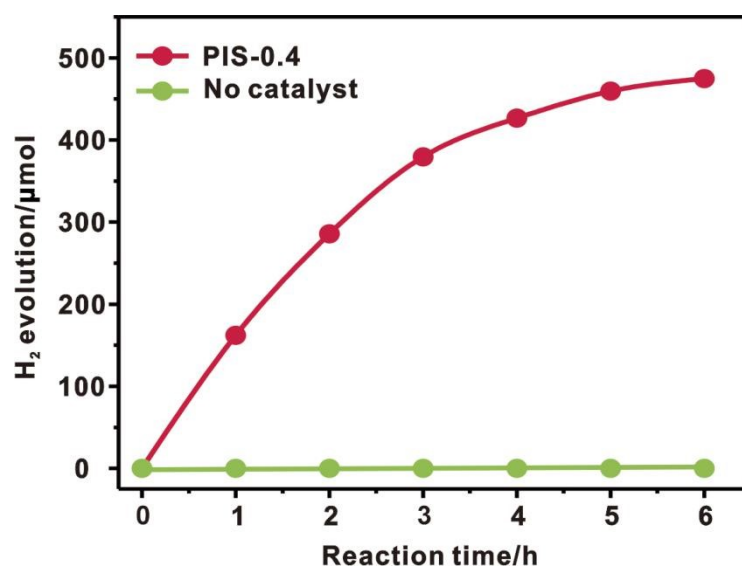

**Figure S6.** The time profiles of hydrogen production from PIS-0.4 and no catalyst suspending in an aqueous solution containing equimolar amounts (1M) of HCHO and NaOH at 0.21 O<sub>2</sub> atm under light conditions.

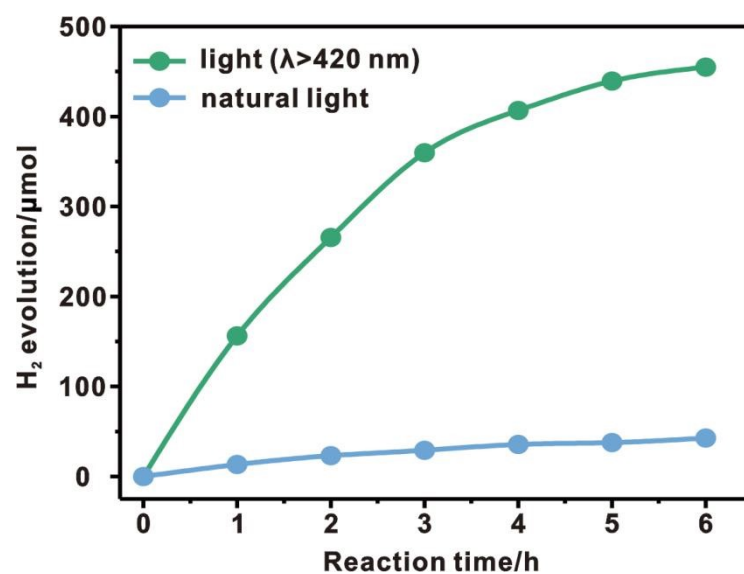

**Figure S7.** The time profiles of hydrogen production from PIS-0.4 suspending in an aqueous solution containing 1 M HCHO and 1 M NaOH at 0.21 O<sub>2</sub> atm, under natural light and light conditions (λ > 420 nm).

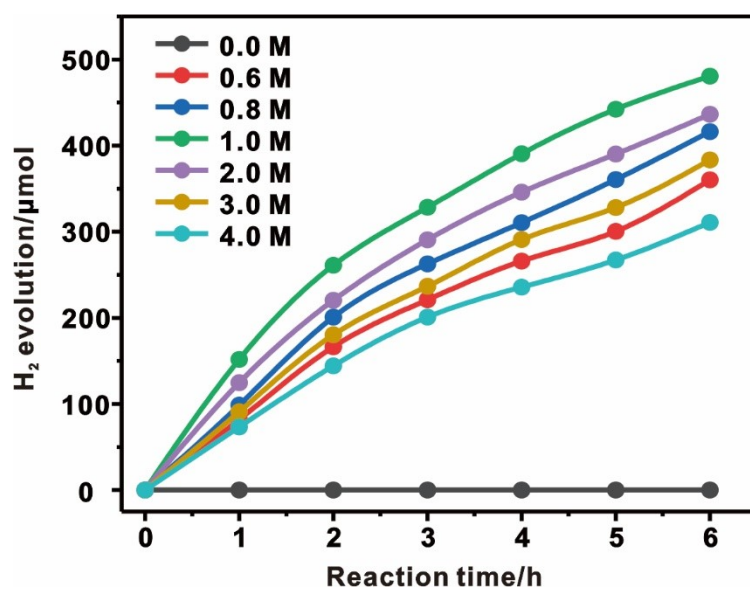

**Figure S8.** The time profiles of hydrogen production from PIS-0.4 suspending in an aqueous solution containing 1 M of NaOH and different concentrations of HCHO at 0.21 O<sub>2</sub> atm under visible-light irradiation ( $\lambda > 420$  nm).

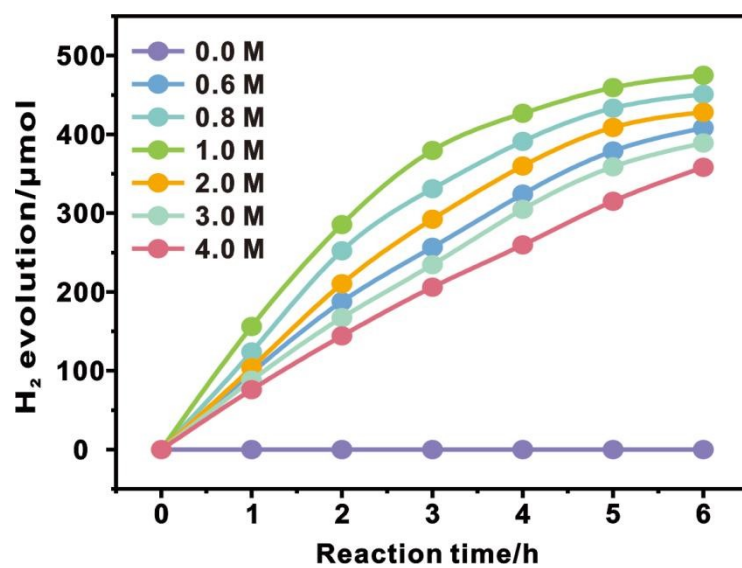

**Figure S9.** The time profiles of hydrogen production from PIS-0.4 suspending in an aqueous solution containing 1 M of HCHO and different concentrations of NaOH at 0.21 O<sub>2</sub> atm under visible-light irradiation ( $\lambda > 420$  nm).

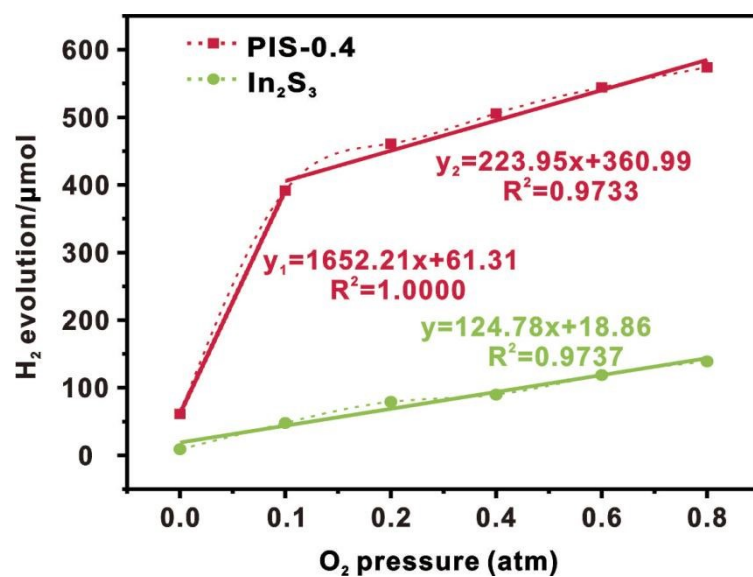

**Figure S10.** The amount of  $\text{H}_2$  evolved after 6 h of photocatalytic reaction of PIS-0.4 and  $\text{In}_2\text{S}_3$  as a function of  $p\text{O}_2$ .

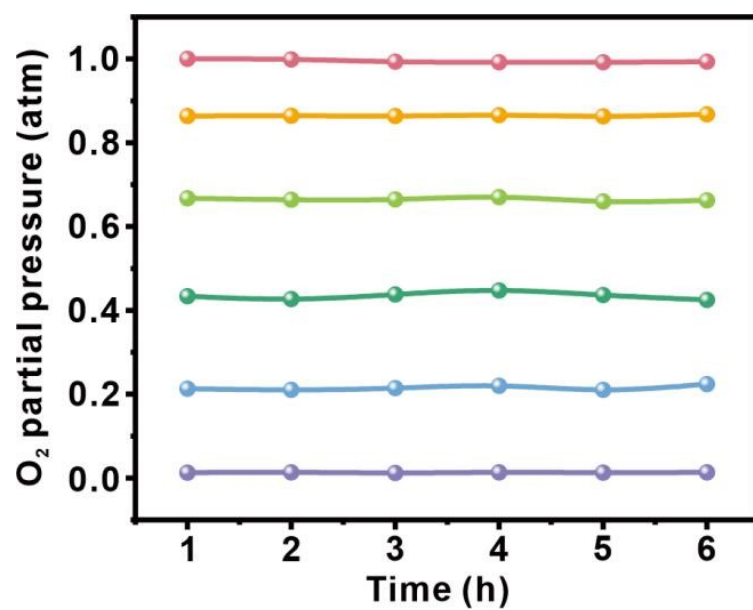

**Figure S11.** The temporal change of O<sub>2</sub> partial pressure within 6 h of reaction with different initial O<sub>2</sub> partial pressure ( $p_{O_2}$ ).
